# Supplementary material for: Thermodynamic characterization of specific interactions between the human Lon protease and G-quartet DNA
Source: PubMed Central journal article supplement — Nucleic Acids Res. 2008 Jan 3;36(4):1273–87. doi: 10.1093/nar/gkm1140 (PMC2275097; doi:10.1093/nar/gkm1140), 2008-01-03

## Supplementary Data

Thermodynamic Characterization of Specific Interactions between the Human Lon Protease and G-quartet DNA

Si-Han Chen, Carolyn K. Suzuki, and Shih-Hsiung Wu<sup>†</sup>

<sup>†</sup> To whom correspondence should be addressed. Tel: +886-2-27855696-7101; Fax: +886-2-27889759; E-mail: [shwu@gate.sinica.edu.tw](mailto:shwu@gate.sinica.edu.tw)

### **Contents**

Figure Legends

Table S1. Sequence summary of G-quadruplex motifs found in human mtDNA

Figure S1. Heat denaturation and base substitution of the LSP sequences

Figure S2. Native gel electrophoresis of G-rich DNA sequences.

Figure S3. Electrophoresis mobility shift assay for the competitive binding of DNA to hLon.

Figure S4. Circular dichroism spectra of hLon in the presence and absence of DNA.

Figure S5. Circular dichroism spectra of DNA in the presence of hLon

Figure S6. Circular dichroism analysis of intermolecular G-quadruplex DNA with known structures

## FIGURES LEGENDS

### **Figure S1. Heat denaturation and base substitution of the LSP sequences.**

LSPas and TG<sub>6</sub>T were incubated at 120°C for 2 hr, and briefly chilled on ice. The samples were analyzed on 20% native PAGE at 20°C. LSPasGA is a variant of LSPas in which the third and fourth guanines were substituted with adenines.

### **Figure S2. Native gel electrophoresis of G-rich DNA sequences.**

The G-rich oligonucleotides as shown were analyzed on 20% PAGE at 20°C.

### **Figure S3. Electrophoresis mobility shift assay for the competitive binding of DNA to hLon.**

hLon (6 μM) was incubated with fluorescently labeled LSPas (1 μM) in the presence of unlabeled DNA competitors (50 μM) for 20 min at the temperature indicated. The reaction mixtures were resolved on 6% polyacrylamide gels in TGE buffer at 25°C (A) or at 37°C (B). hLon binding to the LSPas probe was competed not only by the addition of unlabeled LSPas and LSPas18, but also by unlabeled LS2as, LS4as, LS5as, and LS6as, all of which formed high-ordered structures on native PAGE (Fig. S2). By contrast, TG<sub>6</sub>T did not compete well for hLon. The discrepancy in competitiveness between TG<sub>6</sub>T and other high-order oligonucleotides may be due to the length of DNA. The addition of LSPs, LSPs18, and AC<sub>6</sub>A saturated LSPas differently (control experiment, not shown), and the availability of LSPas quadruplex for hLon was significantly reduced in the presence of LSPs and LSPs18.

**Figure S4. Circular dichroism spectra of hLon in the presence and absence of DNA.**

(A) The CD spectra of hLon (2.5  $\mu$ M) were scanned from 20 to 90°C. (B) hLon mixed with LSPas at a molar ratio of 1:1 was monitored spectroscopically from 20 to 70°C. (C) The CD spectra of the hLon in complex with TG<sub>6</sub>T were obtained similarly.

**Figure S5. Circular dichroism spectra of DNA in the presence of hLon.**

(A) LSPas and (B) TG<sub>6</sub>T complexed with hLon at 10:1 molar ratios were scanned with circular dichroism. The molar ellipticities of LSPas and TG<sub>6</sub>T were slightly reduced in the presence of hLon, but no significant structural transition was found.

**Figure S6. Circular dichroism analysis of intermolecular G-quadruplex DNA with known structures.**

Two DNA sequences known to form intermolecular G-quartets were subjected to CD analysis in buffer containing 10 mM sodium cacodylate (pH 7.5), 100 mM NaCl, 5 mM MgCl<sub>2</sub>, and 0.1 mM EDTA (compare with results shown in Figure 2). The CD spectra of TG<sub>4</sub>T (A) and TG<sub>3</sub>CG<sub>2</sub>T (B) peaked at 261 nm and 258 nm, both of which manifested the structural pattern of parallel G-quartets. The PDB ID for the structures of TG<sub>4</sub>T and TG<sub>3</sub>CG<sub>2</sub>T are 2O4F and 1EVO, respectively. (C) TG<sub>4</sub>T and TG<sub>3</sub>CG<sub>2</sub>T were analyzed on 20% native PAGE.

## TABLES

**Table S1. Sequence summary of G-quadruplex motifs found in human mtDNA**

| Analysis tool: Quadfinder ver. 1.0 ( <a href="http://miracle.igib.res.in/quadfinder/">http://miracle.igib.res.in/quadfinder/</a> ) |                                                                                                                                                                                                                                                                                                                                                                                                                                           |                                  |
|------------------------------------------------------------------------------------------------------------------------------------|-------------------------------------------------------------------------------------------------------------------------------------------------------------------------------------------------------------------------------------------------------------------------------------------------------------------------------------------------------------------------------------------------------------------------------------------|----------------------------------|
| Sequence input: NC_001807 (the H strand of human mtDNA)                                                                            |                                                                                                                                                                                                                                                                                                                                                                                                                                           |                                  |
| Pattern: $G_{3-8}L_{2-20}G_{3-8}L_{2-20}G_{3-8}L_{2-20}G_{3-8}$                                                                    |                                                                                                                                                                                                                                                                                                                                                                                                                                           |                                  |
| Search parameters: G stretch from 3 to 8, N stretch from 2 to 20                                                                   |                                                                                                                                                                                                                                                                                                                                                                                                                                           |                                  |
| Location                                                                                                                           | Sequence (3'→5')                                                                                                                                                                                                                                                                                                                                                                                                                          | Sequence found within the region |
| 435-471<br>436-471<br>437-471<br>438-471                                                                                           | GGGGGGTTGATTGTGAATAAAAGGGGAGGGTGAGGG<br>GGGGGTTGATTGTGAATAAAAGGGGAGGGTGAGGG<br>GGGGTTGATTGTGAATAAAAGGGGAGGGTGAGGG<br>GGTTGATTGTGAATAAAAGGGGAGGGTGAGGG                                                                                                                                                                                                                                                                                     | LSPas                            |
| 536-572<br>536-573<br>536-574<br>536-575<br>537-575                                                                                | GGGGTATGGGGCTTGTTGGTTTGGGGTTTCTGTGGG<br>GGGGTATGGGGCTTGTTGGTTTGGGGTTTCTGTGGGG<br>GGGGTATGGGGCTTGTTGGTTTGGGGTTTCTGTGGGGG<br>GGGGTATGGGGCTTGTTGGTTTGGGGTTTCTGTGGGGGG<br>GGGTATGGGGCTTGTTGGTTTGGGGTTTCTGTGGGGGG                                                                                                                                                                                                                              |                                  |
| 3485-3530<br>3485-3531<br>3486-3531                                                                                                | GGGGATTTTGGGCGGTGTAGATGGTAGTGGGAGATGTAGTGGCGGG<br>GGGGATTTTGGGCGGTGTAGATGGTAGTGGGAGATGTAGTGGCGGGG<br>GGGATTTTGGGCGGTGTAGATGGTAGTGGGAGATGTAGTGGCGGGG                                                                                                                                                                                                                                                                                       |                                  |
| 3567-3588<br>3567-3589<br>3567-3590<br>3568-3590<br>3569-3590<br>3570-3590                                                         | GGGGGAGGGGTATGGGTTGGG<br>GGGGGAGGGGTATGGGTTGGGG<br>GGGGGAGGGGTATGGGTTGGGGG<br>GGGGGAGGGGTATGGGTTGGGGG<br>GGGGGAGGGGTATGGGTTGGGGG<br>GGGAGGGGTATGGGTTGGGGG                                                                                                                                                                                                                                                                                 |                                  |
| 4431-4464<br>4431-4479<br>4431-4480<br>4437-4491<br>4438-4491<br>4457-4491<br>4462-4491                                            | GGGTATGGGGCTTTTACAACCAATATGGGAAGGG<br>GGGTATGGGGCTTTTACAACCAATATGGGAAGGGCATGATTAATTAGGG<br>GGGTATGGGGCTTTTACAACCAATATGGGAAGGGCATGATTAATTAGGGG<br>GGGCTTTTACAACCAATATGGGAAGGGCATGATTAATTAGGGGACCGGGTTGGG<br>GGGCTTTTACAACCAATATGGGAAGGGCATGATTAATTAGGGGACCGGGTTGGG<br>GGGAAGGGCATGATTAATTAGGGGACCGGGTTGGG<br>GGGCATGATTAATTAGGGGACCGGGTTGGG                                                                                                |                                  |
| 4796-4837<br>4796-4838<br>4797-4838<br>4798-4838                                                                                   | GGGGAAAGTGAAGACTCAGGGTCTCCAATGGGTTCCGTGGG<br>GGGGAAAGTGAAGACTCAGGGTCTCCAATGGGTTCCGTGGGG<br>GGGGAAAGTGAAGACTCAGGGTCTCCAATGGGTTCCGTGGGG<br>GGGAAAGTGAAGACTCAGGGTCTCCAATGGGTTCCGTGGGG                                                                                                                                                                                                                                                        |                                  |
| 5194-5235<br>5194-5236<br>5194-5237<br>5194-5256<br>5210-5256                                                                      | GGGAATTAAGGTAGGTGGGAGGAGAGGGATCCTCCGGACGGG<br>GGGAATTAAGGTAGGTGGGAGGAGAGGGATCCTCCGGACGGGG<br>GGGAATTAAGGTAGGTGGGAGGAGAGGGATCCTCCGGACGGGGG<br>GGGAATTAAGGTAGGTGGGAGGAGAGGGATCCTCCGGACGGGGGCGATTGGCCGAAAAACGGG<br>GGGAGGAGAGGGATCCTCCGGACGGGGGCGATTGGCCGAAAAACGGG                                                                                                                                                                           |                                  |
| 5434-5464                                                                                                                          | GGGTGGGGTAAGGAGGGGTGTGAGTAGCGGG                                                                                                                                                                                                                                                                                                                                                                                                           |                                  |
| 8208-8265<br>8208-8275<br>8208-8276<br>8208-8277<br>8229-8296<br>8230-8296<br>8253-8296<br>8263-8296                               | GGGTAGCAGGATCTTAATTAAGGGGATTTTTAGAACTTTATCCCGGGCATAAATGGG<br>GGGTAGCAGGATCTTAATTAAGGGGATTTTTAGAACTTTATCCCGGGCATAAATGGGATATCGTGGG<br>GGGTAGCAGGATCTTAATTAAGGGGATTTTTAGAACTTTATCCCGGGCATAAATGGGATATCGTGGGG<br>GGGGATTTTAGAACTTTATCCCGGGCATAAATGGGATATCGTGGGGGAGATGGGGGAGATCTCGGG<br>GGGATTTTAGAACTTTATCCCGGGCATAAATGGGATATCGTGGGGGAGATGGGGGAGATCTCGGG<br>GGGCATAAATGGGATATCGTGGGGGAGATGGGGGAGATCTCGGG<br>GGGATATCGTGGGGGAGATGGGGGAGATCTCGGG | LS2as                            |
| 9244-9271<br>9244-9280<br>9249-9280                                                                                                | GGTCCGGTACTGGGGATTGTCCCGGGG<br>GGGTCCGGTACTGGGGATTGTCCCGGGGAGAGTCGGG<br>GGTACTGGGGATTGTCCCGGGGAGAGTCGGG                                                                                                                                                                                                                                                                                                                                   |                                  |
| 9527-9574<br>9527-9575<br>9528-9575<br>9533-9596<br>9534-9596<br>9535-9596                                                         | GGGGATGGGGGGTTGATCCTCCCGTGACCGGGGGTTGTCCGTAGTGGG<br>GGGGATGGGGGGTTGATCCTCCCGTGACCGGGGGTTGTCCGTAGTGGGG<br>GGGATGGGGGGTTGATCCTCCCGTGACCGGGGGTTGTCCGTAGTGGGG<br>GGGGGTTGATCCTCCCGTGACCGGGGGTTGTCCGTAGTGGGGGCGATTTAGGGGATCTTCAGGG<br>GGGGGTTGATCCTCCCGTGACCGGGGGTTGTCCGTAGTGGGGGCGATTTAGGGGATCTTCAGGG<br>GGGGTGTGATCCTCCCGTGACCGGGGGTTGTCCGTAGTGGGGGCGATTTAGGGGATCTTCAGGG                                                                     |                                  |

|                                                                                                                                                                                                                               |                                                                                                                                                                                                                                                                                                                                                                                                                                                                                                                                                                                                                                                                                                                                                                                                                                                                                                                                      |       |
|-------------------------------------------------------------------------------------------------------------------------------------------------------------------------------------------------------------------------------|--------------------------------------------------------------------------------------------------------------------------------------------------------------------------------------------------------------------------------------------------------------------------------------------------------------------------------------------------------------------------------------------------------------------------------------------------------------------------------------------------------------------------------------------------------------------------------------------------------------------------------------------------------------------------------------------------------------------------------------------------------------------------------------------------------------------------------------------------------------------------------------------------------------------------------------|-------|
| 9536-9596<br>9556-9596<br>9557-9596<br>9558-9596                                                                                                                                                                              | GGGTTGATCCTCCCGTGACCGGGGGTGTCCGTAGTGGGGCGATTTAGGGGATCTTCAGGG<br>GGGGGTTGTCCGTAGTGGGGCGATTTAGGGGATCTTCAGGG<br>GGGTTGTCCGTAGTGGGGCGATTTAGGGGATCTTCAGGG<br>GGGTTGTCCGTAGTGGGGCGATTTAGGGGATCTTCAGGG                                                                                                                                                                                                                                                                                                                                                                                                                                                                                                                                                                                                                                                                                                                                      |       |
| 10163-10201<br>10163-10208<br>10164-10208<br>10185-10208                                                                                                                                                                      | GGGGAATGCTCACGCCGAAGCTGGGATATAGGGGGCGGG<br>GGGGAATGCTCACGCCGAAGCTGGGATATAGGGGGCGGGCGCAGGG<br>GGGAATGCTCACGCCGAAGCTGGGATATAGGGGGCGGGCGCAGGG<br>GGGATATAGGGGGCGGGCGCAGGG                                                                                                                                                                                                                                                                                                                                                                                                                                                                                                                                                                                                                                                                                                                                                               |       |
| 12019-12087<br>12019-12088<br>12019-12089<br>12042-12105<br>12042-12112<br>12042-12113<br>12064-12113                                                                                                                         | GGGTGGTGAATTGTTGTATTTGGGAGTAAGTGTGCTCTTTGTGGGAGTACAAGTATGTGGATAGGG<br>GGGTGGTGAATTGTTGTATTTGGGAGTAAGTGTGCTCTTTGTGGGAGTACAAGTATGTGGATAGGGG<br>GGGTGGTGAATTGTTGTATTTGGGAGTAAGTGTGCTCTTTGTGGGAGTACAAGTATGTGGATAGGGG<br>GGGAGTAAGTGTGCTCTTTGTGGGAGTACAAGTATGTGGATAGGGGGTAAGAGGAGGATAGGGAGTTGGG<br>GGGAGTAAGTGTGCTCTTTGTGGGAGTACAAGTATGTGGATAGGGGGTAAGAGGAGGATAGGGAGTTGGG<br>GGGAGTACAAGTATGTGGATAGGGGGTAAGAGGAGGATAGGGAGTTGGGG                                                                                                                                                                                                                                                                                                                                                                                                                                                                                                           |       |
| 12363-12388<br>12363-12389<br>12363-12390<br>12363-12391<br>12363-12404<br>12363-12414<br>12363-12435<br>12363-12436<br>12363-12437<br>12369-12437<br>12378-12437<br>12386-12437<br>12387-12437<br>12388-12437<br>12389-12437 | GGGATTGGGACTGAAGGGATTAAGGG<br>GGATTGGGACTGAAGGGATTAAGGGG<br>GGGATTGGGACTGAAGGGATTAAGGGG<br>GGATTGGGACTGAAGGGATTAAGGGGG<br>GGGATTGGGACTGAAGGGATTAAGGGGGTAGGAATGGTGGG<br>GGATTGGGACTGAAGGGATTAAGGGGGTAGGAATGGTGGGAGCAATTGGG<br>GGATTGGGACTGAAGGGATTAAGGGGGTAGGAATGGTGGGAGCAATTGGGATTGTTTTTTTTGAGTATGGG<br>GGATTGGGACTGAAGGGATTAAGGGGGTAGGAATGGTGGGAGCAATTGGGATTGTTTTTTTTGAGTATGGGG<br>GGATTGGGACTGAAGGGATTAAGGGGGTAGGAATGGTGGGAGCAATTGGGATTGTTTTTTTTGAGTATGGGG<br>GGATTGGGACTGAAGGGATTAAGGGGGTAGGAATGGTGGGAGCAATTGGGATTGTTTTTTTTGAGTATGGGG<br>GGATTGGGACTGAAGGGATTAAGGGGGTAGGAATGGTGGGAGCAATTGGGATTGTTTTTTTTGAGTATGGGG<br>GGATTGGGACTGAAGGGATTAAGGGGGTAGGAATGGTGGGAGCAATTGGGATTGTTTTTTTTGAGTATGGGG<br>GGATTGGGACTGAAGGGATTAAGGGGGTAGGAATGGTGGGAGCAATTGGGATTGTTTTTTTTGAGTATGGGG<br>GGATTGGGACTGAAGGGATTAAGGGGGTAGGAATGGTGGGAGCAATTGGGATTGTTTTTTTTGAGTATGGGG<br>GGATTGGGACTGAAGGGATTAAGGGGGTAGGAATGGTGGGAGCAATTGGGATTGTTTTTTTTGAGTATGGGG | LS5as |
| 13011-13056<br>13011-13057<br>13011-13061<br>13011-13062<br>13027-13073<br>13028-13073<br>13036-13073<br>13037-13073                                                                                                          | GGGTTAATCCAGAGGTGGGGACTGAGGGGAGTCGGTATCTTCCGGG<br>GGGTTAATCCAGAGGTGGGGACTGAGGGGAGTCGGTATCTTCCGGGG<br>GGGTTAATCCAGAGGTGGGGACTGAGGGGAGTCGGTATCTTCCGGGGTGGG<br>GGGTTAATCCAGAGGTGGGGACTGAGGGGAGTCGGTATCTTCCGGGGTGGG<br>GGGGACTGAGGGGAGTCGGTATCTTCCGGGGTGGGGTCAGAGTCGGG<br>GGGACTGAGGGGAGTCGGTATCTTCCGGGGTGGGGTCAGAGTCGGG<br>GGGGAGTCGGTATCTTCCGGGGTGGGGTCAGAGTCGGG<br>GGGAGTCGGTATCTTCCGGGGTGGGGTCAGAGTCGGG                                                                                                                                                                                                                                                                                                                                                                                                                                                                                                                              |       |
| 13755-13808<br>13756-13808<br>13757-13808                                                                                                                                                                                     | GGGGCGTAGGGGGAAGGTTTGTGTAGGGGGAGATGGATTTTGTAGTGTCCGG<br>GGGGCGTAGGGGGAAGGTTTGTGTAGGGGGAGATGGATTTTGTAGTGTCCGG<br>GGGCGTAGGGGGAAGGTTTGTGTAGGGGGAGATGGATTTTGTAGTGTCCGG                                                                                                                                                                                                                                                                                                                                                                                                                                                                                                                                                                                                                                                                                                                                                                  |       |
| 14228-14278<br>14228-14284<br>14228-14285<br>14245-14285<br>14246-14285<br>14247-14285                                                                                                                                        | GGGTATTAGTATGTTTCGGGGCGTGGTTATCCTAGGAGGGCTTAGTTGGG<br>GGGTATTAGTATGTTTCGGGGCGTGGTTATCCTAGGAGGGCTTAGTTGGGACTGGG<br>GGGTATTAGTATGTTTCGGGGCGTGGTTATCCTAGGAGGGCTTAGTTGGGACTGGG<br>GGGGCGTGGTTATCCTAGGAGGGCTTAGTTGGGACTGGG<br>GGGGCGTGGTTATCCTAGGAGGGCTTAGTTGGGACTGGG<br>GGGGCGTGGTTATCCTAGGAGGGCTTAGTTGGGACTGGG<br>GGGGCGTGGTTATCCTAGGAGGGCTTAGTTGGGACTGGG                                                                                                                                                                                                                                                                                                                                                                                                                                                                                                                                                                               |       |
| 15503-15540<br>15503-15541<br>15503-15545<br>15503-15546<br>15503-15557<br>15517-15557<br>15527-15557<br>15528-15557                                                                                                          | GGGTCTGTTAATATGGGATCGGTTGGGGAATTTGTGGG<br>GGGTCTGTTAATATGGGATCGGTTGGGGAATTTGTGGG<br>GGGTCTGTTAATATGGGATCGGTTGGGGAATTTGTGGGGAGGG<br>GGGTCTGTTAATATGGGATCGGTTGGGGAATTTGTGGGGAGGG<br>GGGTCTGTTAATATGGGATCGGTTGGGGAATTTGTGGGGAGGGTGTAGTTCGGG<br>GGGATCGGTTGGGGAATTTGTGGGGAGGGGTGTAGTTCGGG<br>GGGGAATTTGTGGGAGGGGTGTAGTTCGGG<br>GGGAATTTGTGGGAGGGGTGTAGTTCGGG                                                                                                                                                                                                                                                                                                                                                                                                                                                                                                                                                                             | LS6as |
| 16168-16191<br>16168-16192<br>16168-16193<br>16168-16194<br>16168-16195<br>16355-16397                                                                                                                                        | GGGTTGGGTGTAGTTGGGGGGGG<br>GGGTTGGGTGTAGTTGGGGGGGG<br>GGGTTGGGTGTAGTTGGGGGGGG<br>GGGTTGGGTGTAGTTGGGGGGGG<br>GGGTTGGGTGTAGTTGGGGGGGG<br>GGGAAAGACAGGGGTACCTACTGGGGGAGTCTATCCCCAGGG                                                                                                                                                                                                                                                                                                                                                                                                                                                                                                                                                                                                                                                                                                                                                    |       |

## FIGURES

Figure S1.

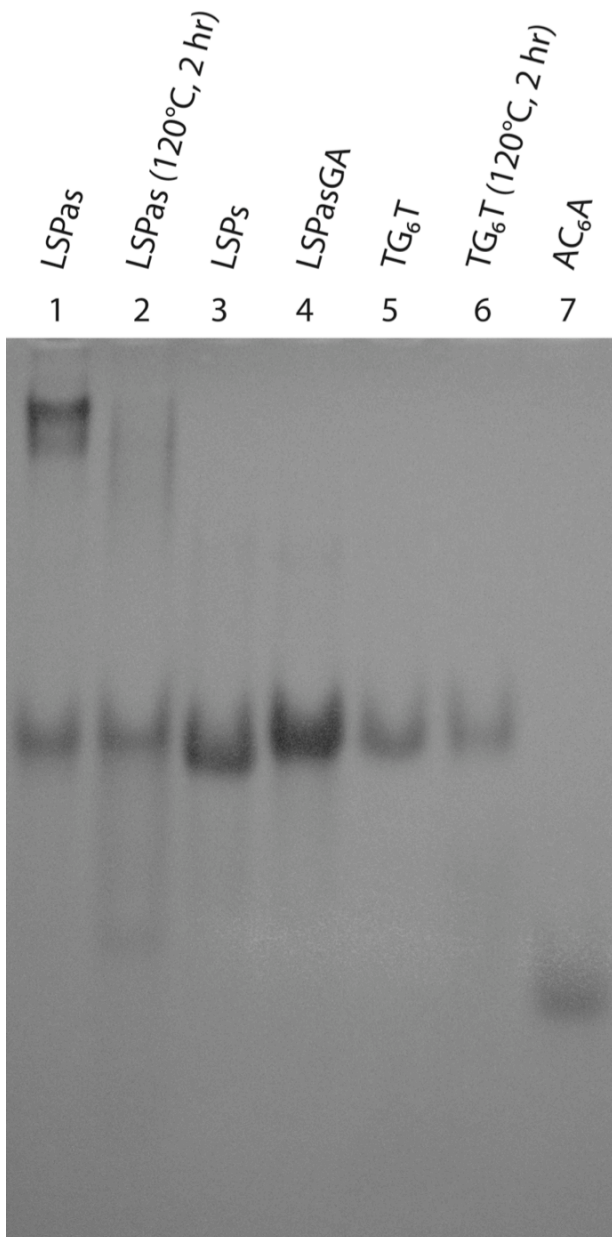

**Figure S2.**

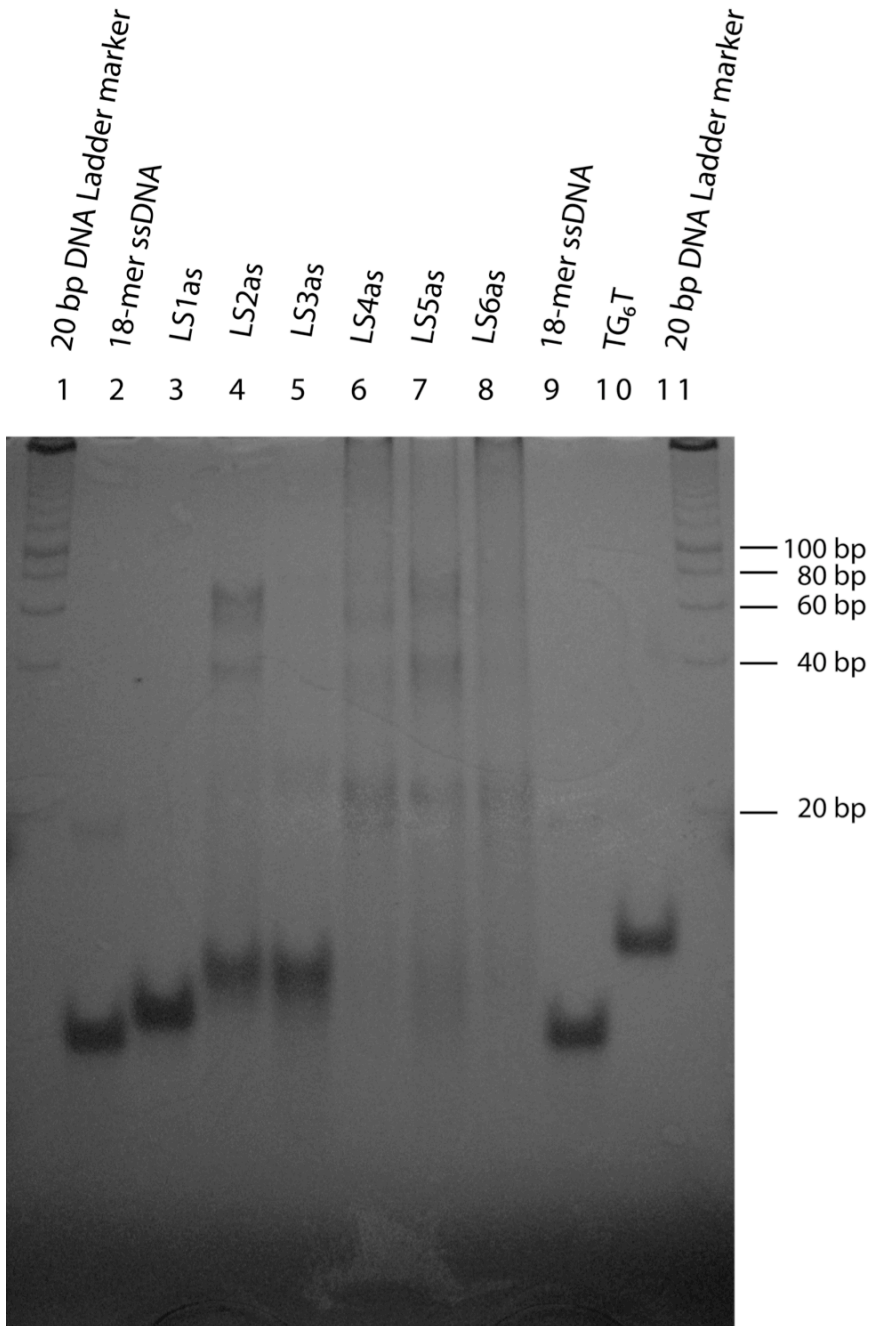

**Figure S3.**

**Competition EMSA for the binding of hLon to LSPas**

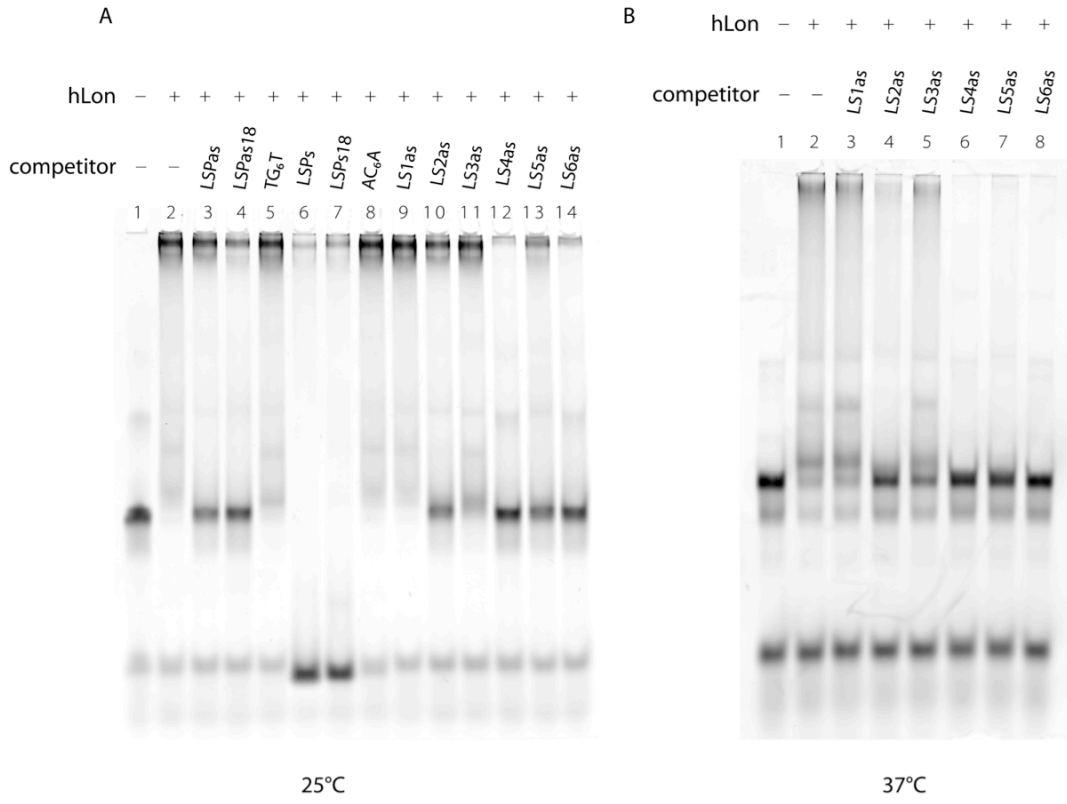



**Figure S4.**

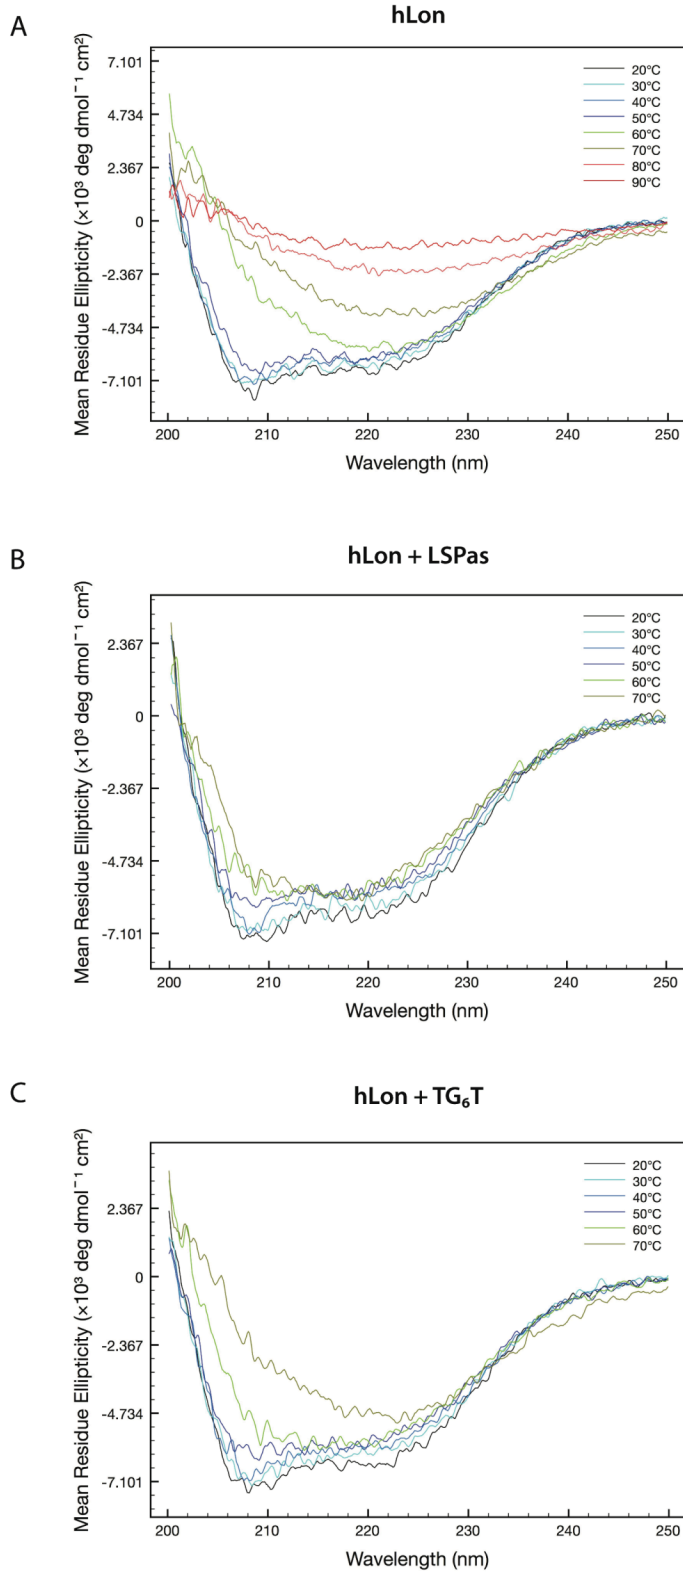

Figure S5.

A

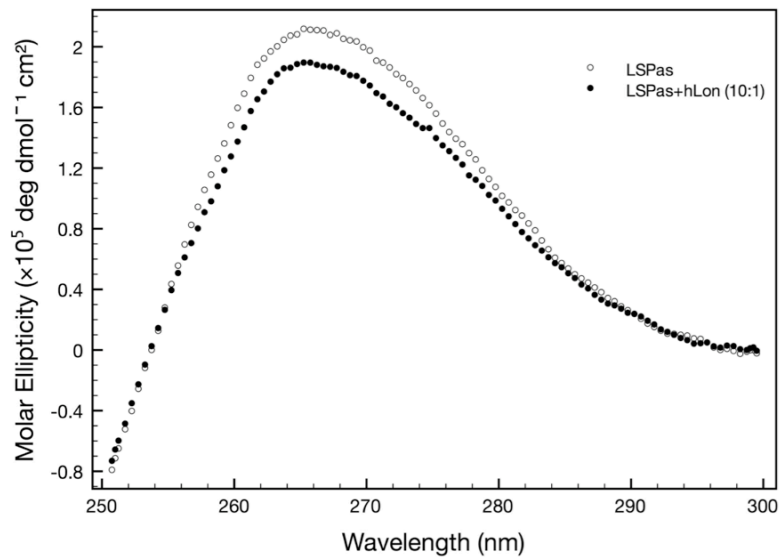

B

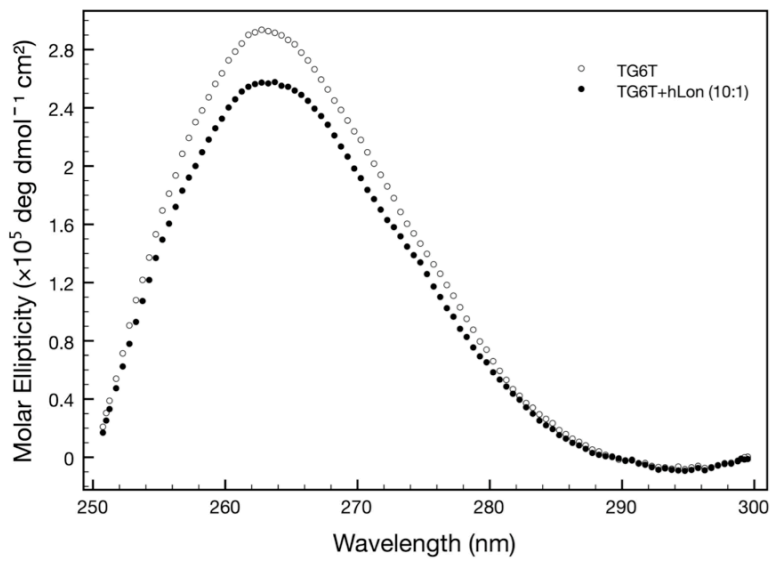

Figure S6.

A

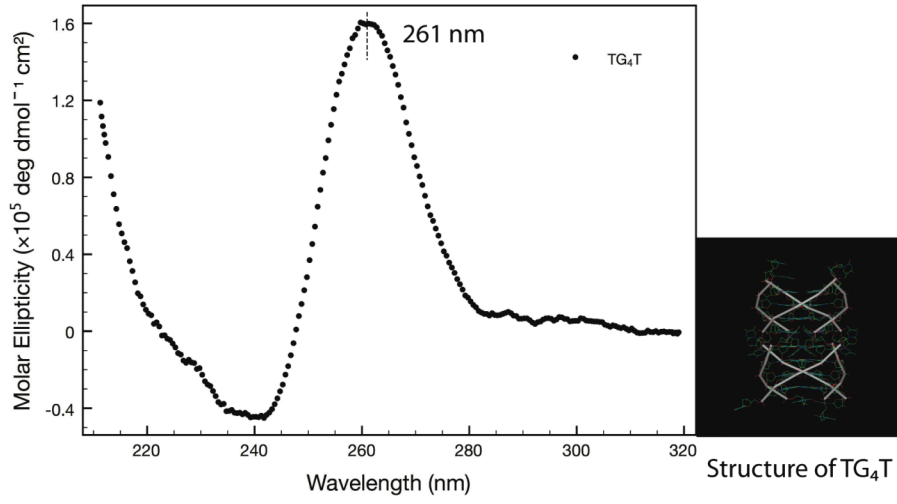

B

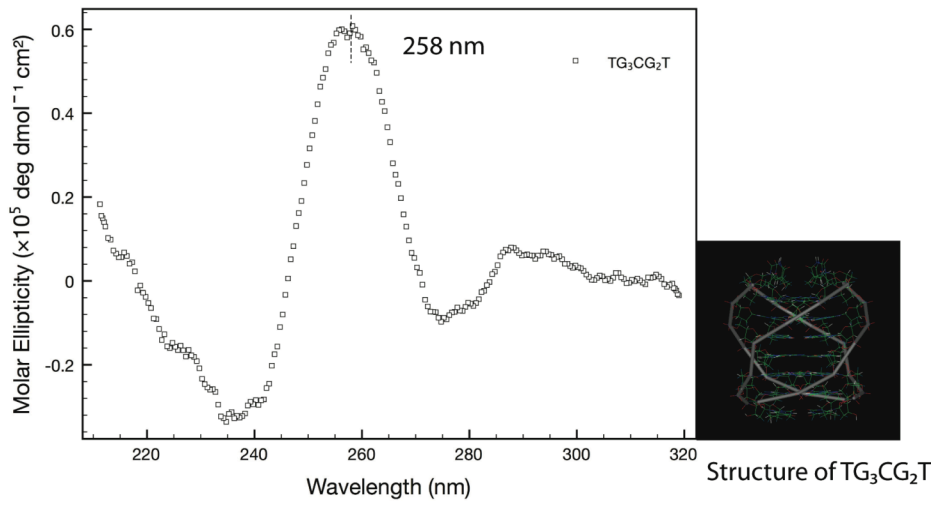

C

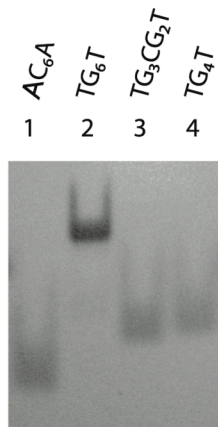

Supplement: nar_gkm1140_1.pdf [file nar_gkm1140_1.pdf]
